# Supplementary material for: West Nile Virus in the State of Ceará, Northeast Brazil
Source: MDPI journal article supplement (doi:10.3390/microorganisms9081699), 2021-08-10
Supplement: s1 [file s1]

**Table S3.** Amplification of WNV-seropositive free-ranging bird species collected at Farm 1, Boa Viagem, CE.

| <b>Species</b>                 | <b>#Specimens Captured</b> | <b>C</b> | <b>#Specimens Tested</b> | <b>S</b> | <b>Prop. (95% CI)</b> | <b>A</b> |
|--------------------------------|----------------------------|----------|--------------------------|----------|-----------------------|----------|
| <i>Thlypopsis sordida</i>      | 2                          | 1.7%     | 1                        | 100%     | 1.00 (0.21-1.00)      | 17,000   |
| <i>Columbina talpacoti</i>     | 2                          | 1.7%     | 2                        | 50%      | 0.50 (0.09-0.91)      | 4,250    |
| <i>Turdus rufoventris</i>      | 2                          | 1.7%     | 2                        | 50%      | 0.50 (0.09-0.91)      | 4,250    |
| <i>Furnarius figulus</i>       | 4                          | 3.5%     | 4                        | 25%      | 0.25 (0.05-0.70)      | 2,187.5  |
| <i>Passer domesticus</i>       | 68                         | 59.1%    | 62                       | 4.8%     | 0.05 (0.02-0.13)      | 1,361.7  |
| <i>Coryphospingus pileatus</i> | 9                          | 7.8%     | 8                        | 12.5%    | 0.12 (0.02-0.47)      | 1,218.7  |

A (amplification capacity) = C (Relative abundance) × S (seroprevalence)<sup>2</sup>
