# Supplementary material for: West Nile Virus in the State of Ceará, Northeast Brazil
Source: MDPI journal article supplement (doi:10.3390/microorganisms9081699), 2021-08-10
Supplement: s1 [file s1]

**Table S4.** Mosquito species captured at distinct environments and with different methods in Boa Viagem, Ceará, Brazil, in September 2019.

| A: Sum of mosquitoes caught in periurban and rural areas of Boa Viagem, Ceará |               |    |       |                 |    |     |             |      |    |     |             |                  |                    |   |              |     |       |     |             |       |       |
|-------------------------------------------------------------------------------|---------------|----|-------|-----------------|----|-----|-------------|------|----|-----|-------------|------------------|--------------------|---|--------------|-----|-------|-----|-------------|-------|-------|
| Mosquito species                                                              | Inside houses |    |       | Close to houses |    |     |             |      |    |     | Open fields |                  |                    |   |              |     |       |     | Grand Total |       |       |
|                                                                               | Asp.          |    | Total | Chicken sheds   |    |     | Horse barns |      |    |     | Total       | Human attraction |                    |   |              | CDC |       |     |             | Total |       |
|                                                                               |               |    |       | CDC             |    |     | Total       | Asp. |    | CDC |             | Total            | Directly with nets |   | Shannon trap |     | Total | CDC |             |       | Total |
|                                                                               | ♀             | ♂  |       | ♀               | ♂  |     |             | ♀    | ♂  | ♀   |             |                  | ♂                  |   | ♀            | ♂   |       | ♀   |             |       |       |
| <i>Ad. squamipennis</i>                                                       |               |    |       | 1               | 1  | 2   |             |      | 1  | 1   | 2           | 4                |                    |   |              |     | 4     |     | 4           | 8     |       |
| <i>Ae. aegypti</i>                                                            | 7             | 7  | 14    |                 |    |     |             |      |    |     |             |                  |                    |   |              |     |       |     | 0           | 14    |       |
| <i>Ae. fluviatilis</i>                                                        |               |    |       |                 |    |     |             |      |    |     |             |                  | 1                  |   |              | 1   |       |     | 1           | 1     |       |
| <i>Ae. scapularis</i>                                                         |               |    |       |                 |    |     |             |      |    |     |             |                  | 2                  |   |              | 2   |       |     | 2           | 2     |       |
| <i>An. albitarsis</i> s.l.                                                    | 1             | 1  | 2     |                 |    |     |             |      |    |     |             |                  |                    |   |              |     | 12    | 7   | 19          | 21    |       |
| <i>An. oswaldoi</i> s.l.                                                      |               |    |       |                 |    |     |             |      |    |     |             |                  |                    |   |              |     |       | 1   | 1           | 1     |       |
| <i>An. triannulatus</i> s.l.                                                  |               |    |       | 1               |    | 1   |             |      | 1  |     | 1           | 2                |                    |   |              |     | 9     | 0   | 9           | 11    |       |
| <i>Anopheles</i> (Nys.) sp.                                                   | 1             |    | 1     |                 |    |     |             |      |    |     |             |                  |                    | 1 |              | 1   | 12    |     | 12          | 14    |       |
| <i>Cq. nigricans</i>                                                          | 1             |    | 1     | 1               |    | 1   |             |      |    |     |             | 1                |                    | 1 |              | 8   |       | 8   | 9           | 11    |       |
| <i>Cq. veneuelensis</i>                                                       | 1             |    | 1     |                 |    |     |             |      |    |     |             |                  |                    |   |              |     |       |     | 0           | 1     |       |
| <i>Cx. amazonensis</i>                                                        |               |    |       |                 |    |     |             |      |    |     |             |                  |                    |   |              | 3   |       | 3   | 3           | 3     |       |
| <i>Cx. chidesteri</i>                                                         |               |    |       |                 |    |     |             |      |    |     |             |                  |                    |   |              | 5   | 7     | 12  | 12          | 12    |       |
| <i>Cx. coronator</i> Complex                                                  |               |    |       |                 |    |     |             |      | 4  |     | 4           | 4                | 6                  |   |              | 6   | 5     |     | 5           | 15    |       |
| <i>Cx. declarator</i>                                                         | 5             |    | 5     | 1               |    | 1   |             |      | 2  |     | 2           | 3                | 1                  |   |              | 1   | 29    | 2   | 31          | 40    |       |
| <i>Cx. nigripalpus</i>                                                        |               |    |       | 1               |    | 1   |             |      | 2  | 1   | 3           | 4                | 1                  | 1 |              | 2   | 14    |     | 14          | 20    |       |
| <i>Cx. quinquefasciatus</i>                                                   | 72            | 52 | 124   | 2               | 3  | 5   | 1           | 1    | 3  | 9   | 14          | 19               | 4                  | 1 |              | 5   | 7     | 2   | 9           | 157   |       |
| <i>Cx. (Cux.) sp.</i>                                                         |               |    |       | 4               |    | 4   |             |      | 1  |     | 1           | 5                |                    |   |              | 19  |       | 19  | 19          | 24    |       |
| <i>Cx. inhibitor</i>                                                          |               |    |       |                 |    |     |             |      |    |     |             |                  |                    |   | 14           | 14  |       |     | 14          | 14    |       |
| <i>Cx. panacossa</i>                                                          |               |    |       |                 |    |     |             |      | 1  |     | 1           | 1                | 1                  |   |              | 1   | 4     | 12  | 16          | 18    |       |
| <i>Cx. ribeirensis</i> (?)                                                    |               |    |       |                 |    |     |             |      |    |     |             |                  |                    |   |              |     | 4     |     | 4           | 4     |       |
| <i>Culex</i> (Mel.) sp.                                                       | 1             |    | 1     |                 |    |     |             |      |    |     |             |                  | 9                  |   | 6            | 15  | 36    | 4   | 40          | 56    |       |
| <i>Culex</i> spp.                                                             |               |    |       | 2               |    | 2   |             |      | 2  |     | 2           | 4                | 4                  |   |              | 4   | 11    | 2   | 13          | 21    |       |
| <i>Ma. indubitans</i>                                                         | 7             |    | 7     | 3               |    | 3   |             |      | 1  |     | 1           | 4                | 25                 |   | 1            | 26  | 33    | 1   | 34          | 71    |       |
| <i>Ma. pseudotitillans</i>                                                    | 1             |    | 1     | 1               |    | 1   |             |      |    |     |             | 1                | 21                 |   |              | 21  |       |     | 21          | 23    |       |
| <i>Ma. titillans</i>                                                          | 6             | 4  | 10    | 26              | 39 | 65  | 3           | 1    | 9  | 5   | 18          | 83               | 94                 | 1 | 18           | 113 | 27    | 3   | 30          | 236   |       |
| <i>Mansonia</i> sp.                                                           | 7             | 1  | 8     | 13              | 2  | 15  |             |      |    | 5   | 5           | 20               | 9                  | 4 |              | 13  | 6     | 5   | 11          | 52    |       |
| <i>Ur. lowii</i>                                                              |               |    |       |                 |    |     |             |      |    |     |             |                  |                    |   |              |     | 1     |     | 1           | 1     |       |
| <i>Uranotaenia</i> sp.                                                        |               |    |       | 1               |    | 1   |             |      | 1  |     | 1           | 2                |                    |   |              |     |       |     | 0           | 2     |       |
| Total                                                                         | 110           | 65 | 175   | 57              | 45 | 102 | 4           | 2    | 27 | 22  | 55          | 157              | 178                | 7 | 26           | 15  | 226   | 249 | 46          | 295   |       |
|                                                                               |               |    |       |                 |    |     |             |      |    |     |             |                  |                    |   |              |     |       |     |             |       |       |
|                                                                               |               |    |       |                 |    |     |             |      |    |     |             |                  |                    |   |              |     |       |     |             |       |       |
|                                                                               |               |    |       |                 |    |     |             |      |    |     |             |                  |                    |   |              |     |       |     |             |       |       |
|                                                                               |               |    |       |                 |    |     |             |      |    |     |             |                  |                    |   |              |     |       |     |             |       |       |
|                                                                               |               |    |       |                 |    |     |             |      |    |     |             |                  |                    |   |              |     |       |     |             |       |       |
|                                                                               |               |    |       |                 |    |     |             |      |    |     |             |                  |                    |   |              |     |       |     |             |       |       |
|                                                                               |               |    |       |                 |    |     |             |      |    |     |             |                  |                    |   |              |     |       |     |             |       |       |
|                                                                               |               |    |       |                 |    |     |             |      |    |     |             |                  |                    |   |              |     |       |     |             |       |       |
|                                                                               |               |    |       |                 |    |     |             |      |    |     |             |                  |                    |   |              |     |       |     |             |       |       |
|                                                                               |               |    |       |                 |    |     |             |      |    |     |             |                  |                    |   |              |     |       |     |             |       |       |
|                                                                               |               |    |       |                 |    |     |             |      |    |     |             |                  |                    |   |              |     |       |     |             |       |       |
|                                                                               |               |    |       |                 |    |     |             |      |    |     |             |                  |                    |   |              |     |       |     |             |       |       |
|                                                                               |               |    |       |                 |    |     |             |      |    |     |             |                  |                    |   |              |     |       |     |             |       |       |
|                                                                               |               |    |       |                 |    |     |             |      |    |     |             |                  |                    |   |              |     |       |     |             |       |       |
|                                                                               |               |    |       |                 |    |     |             |      |    |     |             |                  |                    |   |              |     |       |     |             |       |       |
|                                                                               |               |    |       |                 |    |     |             |      |    |     |             |                  |                    |   |              |     |       |     |             |       |       |
|                                                                               |               |    |       |                 |    |     |             |      |    |     |             |                  |                    |   |              |     |       |     |             |       |       |
|                                                                               |               |    |       |                 |    |     |             |      |    |     |             |                  |                    |   |              |     |       |     |             |       |       |
|                                                                               |               |    |       |                 |    |     |             |      |    |     |             |                  |                    |   |              |     |       |     |             |       |       |
|                                                                               |               |    |       |                 |    |     |             |      |    |     |             |                  |                    |   |              |     |       |     |             |       |       |
|                                                                               |               |    |       |                 |    |     |             |      |    |     |             |                  |                    |   |              |     |       |     |             |       |       |
|                                                                               |               |    |       |                 |    |     |             |      |    |     |             |                  |                    |   |              |     |       |     |             |       |       |
|                                                                               |               |    |       |                 |    |     |             |      |    |     |             |                  |                    |   |              |     |       |     |             |       |       |
|                                                                               |               |    |       |                 |    |     |             |      |    |     |             |                  |                    |   |              |     |       |     |             |       |       |
|                                                                               |               |    |       |                 |    |     |             |      |    |     |             |                  |                    |   |              |     |       |     |             |       |       |
|                                                                               |               |    |       |                 |    |     |             |      |    |     |             |                  |                    |   |              |     |       |     |             |       |       |
|                                                                               |               |    |       |                 |    |     |             |      |    |     |             |                  |                    |   |              |     |       |     |             |       |       |
|                                                                               |               |    |       |                 |    |     |             |      |    |     |             |                  |                    |   |              |     |       |     |             |       |       |
|                                                                               |               |    |       |                 |    |     |             |      |    |     |             |                  |                    |   |              |     |       |     |             |       |       |
|                                                                               |               |    |       |                 |    |     |             |      |    |     |             |                  |                    |   |              |     |       |     |             |       |       |
|                                                                               |               |    |       |                 |    |     |             |      |    |     |             |                  |                    |   |              |     |       |     |             |       |       |
|                                                                               |               |    |       |                 |    |     |             |      |    |     |             |                  |                    |   |              |     |       |     |             |       |       |
|                                                                               |               |    |       |                 |    |     |             |      |    |     |             |                  |                    |   |              |     |       |     |             |       |       |
|                                                                               |               |    |       |                 |    |     |             |      |    |     |             |                  |                    |   |              |     |       |     |             |       |       |

Asp.: backpack aspirator; CDC: CDC light trap.

**B: Mosquitoes captured in the periurban areas corresponding to the probable local of infection of the WNV index case and surroundings at Boa Viagem, Ceará.**

| Mosquito species             | Inside houses |       | Close to houses |       |      |             |       |                    |       |                  | Open fields |     |     |       |    |     |       |     | Grand Total |     |     |     |
|------------------------------|---------------|-------|-----------------|-------|------|-------------|-------|--------------------|-------|------------------|-------------|-----|-----|-------|----|-----|-------|-----|-------------|-----|-----|-----|
|                              | Asp.          | Total | Chicken sheds   |       |      | Horse barns |       |                    | Total | Human attraction |             |     |     | CDC   |    |     | Total |     |             |     |     |     |
|                              |               |       | CDC             | Total | Asp. | CDC         | Total | Directly with nets |       | Shannon Trap     | Total       | ♀   | ♂   | Total |    |     |       |     |             |     |     |     |
|                              |               |       |                 |       |      |             |       |                    |       |                  |             |     |     |       | ♀  | ♂   |       | ♀   |             | ♂   | ♀   | ♂   |
| <i>Ad. squamipennis</i>      |               |       | 1               | 1     | 2    |             |       | 1                  | 1     | 2                | 4           |     |     |       |    | 1   |       | 1   | 1           | 5   |     |     |
| <i>Ae. aegypti</i>           | 7             | 7     | 14              |       |      |             |       |                    |       |                  |             |     |     |       |    |     |       | 0   | 14          |     |     |     |
| <i>Ae. fluviatilis</i>       |               |       |                 |       |      |             |       |                    |       |                  | 1           |     |     | 1     |    |     |       | 1   | 1           |     |     |     |
| <i>Ae. scapularis</i>        |               |       |                 |       |      |             |       |                    |       |                  | 2           |     |     | 2     |    |     |       | 2   | 2           |     |     |     |
| <i>An. oswaldoi</i> s.l.     |               |       |                 |       |      |             |       |                    |       |                  |             |     |     |       |    | 1   |       | 1   | 1           |     |     |     |
| <i>An. triannulatus</i> s.l. |               |       |                 | 1     |      | 1           |       |                    | 1     | 1                | 2           |     |     |       | 2  | 0   | 2     | 2   | 4           |     |     |     |
| <i>Anopheles</i> (Nys.) sp.  | 1             |       | 1               |       |      |             |       |                    |       |                  |             |     | 1   |       | 1  |     |       | 1   | 2           |     |     |     |
| <i>Cq. nigricans</i>         |               |       |                 | 1     |      | 1           |       |                    |       |                  | 1           |     | 1   | 1     |    |     |       | 1   | 2           |     |     |     |
| <i>Cx. amazonensis</i>       |               |       |                 |       |      |             |       |                    |       |                  |             |     |     |       | 3  |     | 3     | 3   | 3           |     |     |     |
| <i>Cx. chidesteri</i>        |               |       |                 |       |      |             |       |                    |       |                  |             |     |     |       | 5  | 7   | 12    | 12  | 12          |     |     |     |
| <i>Cx. coronator</i> Complex |               |       |                 |       |      |             |       | 4                  |       | 4                | 4           | 6   |     | 6     | 5  |     | 5     | 11  | 15          |     |     |     |
| <i>Cx. declarator</i>        | 3             |       | 3               | 1     |      | 1           |       | 2                  |       | 2                | 3           | 1   |     | 1     | 28 | 2   | 30    | 31  | 37          |     |     |     |
| <i>Cx. nigripalpus</i>       |               |       |                 | 1     |      | 1           |       | 2                  | 1     | 3                | 4           | 1   | 1   | 2     | 13 |     | 13    | 15  | 19          |     |     |     |
| <i>Cx. quinquefasciatus</i>  | 70            | 52    | 122             | 2     | 3    | 5           | 1     | 1                  | 3     | 9                | 14          | 19  | 4   | 1     | 5  | 4   | 1     | 5   | 10          | 151 |     |     |
| <i>Cx. (Cux.)</i> sp.        |               |       |                 | 4     |      | 4           |       |                    | 1     |                  | 1           | 5   |     |       | 19 |     | 19    | 19  | 24          |     |     |     |
| <i>Cx. inhibitor</i>         |               |       |                 |       |      |             |       |                    |       |                  |             |     |     | 14    | 14 |     |       | 14  | 14          |     |     |     |
| <i>Cx. panacossa</i>         |               |       |                 |       |      |             |       |                    | 1     | 1                | 1           | 1   |     | 1     | 4  | 12  | 16    | 17  | 18          |     |     |     |
| <i>Cx. ribeirensis</i> (?)   |               |       |                 |       |      |             |       |                    |       |                  |             |     |     |       | 4  |     | 4     | 4   | 4           |     |     |     |
| <i>Cx. (Mel.)</i> sp.        | 1             |       | 1               |       |      |             |       |                    |       |                  |             | 9   | 6   | 15    | 36 | 4   | 40    | 55  | 56          |     |     |     |
| <i>Culex</i> spp.            |               |       |                 | 2     |      | 2           |       | 2                  |       | 2                | 4           | 4   |     | 4     | 9  | 2   | 11    | 15  | 19          |     |     |     |
| <i>Ma. indubitans</i>        |               |       |                 | 3     |      | 3           |       | 1                  |       | 1                | 4           | 25  | 1   | 26    | 1  |     | 1     | 27  | 31          |     |     |     |
| <i>Ma. pseudotitillans</i>   | 1             |       | 1               | 1     |      | 1           |       |                    |       |                  | 1           | 21  |     | 21    |    |     |       | 21  | 23          |     |     |     |
| <i>Ma. titillans</i>         | 2             | 1     | 3               | 26    | 39   | 65          | 3     | 1                  | 9     | 5                | 18          | 83  | 94  | 1     | 18 | 113 | 21    | 3   | 24          | 137 | 223 |     |
| <i>Mansonia</i> sp.          |               | 1     | 1               | 13    | 2    | 15          |       |                    | 5     | 5                | 20          | 9   | 4   | 13    | 2  | 1   | 3     | 16  | 37          |     |     |     |
| <i>Uranotaenia</i> sp.       |               |       |                 | 1     |      | 1           |       | 1                  |       | 1                | 2           |     |     |       |    |     |       | 0   | 2           |     |     |     |
|                              | 85            | 61    | 146             | 57    | 45   | 102         | 4     | 2                  | 27    | 22               | 55          | 157 | 178 | 7     | 26 | 15  | 226   | 157 | 33          | 189 | 416 | 719 |

Asp.: backpack aspirator; CDC: CDC light trap.

**C: Mosquitoes captured in the rural area, namely Farm1, located around 5km from the probable local of infection of the WNV index case in Boa Viagem, Ceará.**

| Mosquito species             | Inside houses |   |       | Open fields |   |       | Grand total |
|------------------------------|---------------|---|-------|-------------|---|-------|-------------|
|                              | Asp.          |   | Total | CDC         |   | Total |             |
|                              | ♀             | ♂ |       | ♀           | ♂ |       |             |
| <i>Ad. squamipennis</i>      |               |   |       | 3           |   | 3     | 3           |
| <i>Anopheles</i> (Nys.) sp.  |               |   |       | 12          |   | 12    | 12          |
| <i>An. albitarsis</i> s.l.   | 1             | 1 | 2     | 12          | 7 | 19    | 21          |
| <i>An. triannulatus</i> s.l. |               |   |       | 7           |   | 7     | 7           |
| <i>Cq. nigricans</i>         | 1             |   | 1     | 8           |   | 8     | 9           |

|                               |    |   |           |    |          |            |
|-------------------------------|----|---|-----------|----|----------|------------|
| <i>Cq. veneuelensis</i>       | 1  |   | <b>1</b>  |    |          | <b>1</b>   |
| <i>Cx. nigripalpus</i>        |    |   |           | 1  | <b>1</b> | <b>1</b>   |
| <i>Cx. quinquefasciatus</i>   | 2  |   | <b>2</b>  | 3  | 1        | <b>4</b>   |
| <i>Cx. declarator</i> Complex | 2  |   | <b>2</b>  | 1  |          | <b>1</b>   |
| <i>Cx. spp.</i>               |    |   |           | 2  |          | <b>2</b>   |
| <i>Ma. indubitans</i>         | 7  |   | <b>7</b>  | 32 | 1        | <b>33</b>  |
| <i>Ma. titillans</i>          | 4  | 3 | <b>7</b>  | 6  |          | <b>6</b>   |
| <i>Mansonia sp.</i>           | 7  |   | <b>7</b>  | 4  | 4        | <b>8</b>   |
| <i>Ur. lowii</i>              |    |   |           | 1  |          | <b>1</b>   |
| <b>TOTAL</b>                  | 25 | 4 | <b>29</b> | 92 | 13       | <b>105</b> |

Asp.: backpack aspirator; CDC: CDC light trap.
