# Supplementary material for: West Nile Virus in the State of Ceará, Northeast Brazil
Source: MDPI journal article supplement (doi:10.3390/microorganisms9081699), 2021-08-10
Supplement: s1 [file s1]

**Table S2.** Amplification of WNV-seropositive free-ranging bird species collected at PLI, Boa Viagem, CE.

| <b>Species</b>                | <b>#Specimens Captured</b> | <b>C</b> | <b>#Specimens Tested</b> | <b>S</b> | <b>Prop. (95% CI)</b> | <b>A</b> |
|-------------------------------|----------------------------|----------|--------------------------|----------|-----------------------|----------|
| <i>Forpus xanthopterygius</i> | 2                          | 0.7%     | 2                        | 50%      | 0.50 (0.09-0.91)      | 1,750    |
| <i>Turdus rufiventris</i>     | 4                          | 1.5%     | 4                        | 25%      | 0.25 (0.05-0.70)      | 937.5    |
| <i>Thraupis sayaca</i>        | 20                         | 7.6%     | 19                       | 10.5%    | 0.10 (0.03-0.30)      | 838      |
| <i>Columbina talpacoti</i>    | 19                         | 7.2%     | 11                       | 9.1%     | 0.09 (0.02-0.38)      | 596.2    |

A (amplification capacity) = C (Relative abundance) × S (seroprevalence)<sup>2</sup>.
