# Supplementary figures and images for: West Nile Virus in the State of Ceará, Northeast Brazil
Source: MDPI journal article supplement (doi:10.3390/microorganisms9081699), 2021-08-10

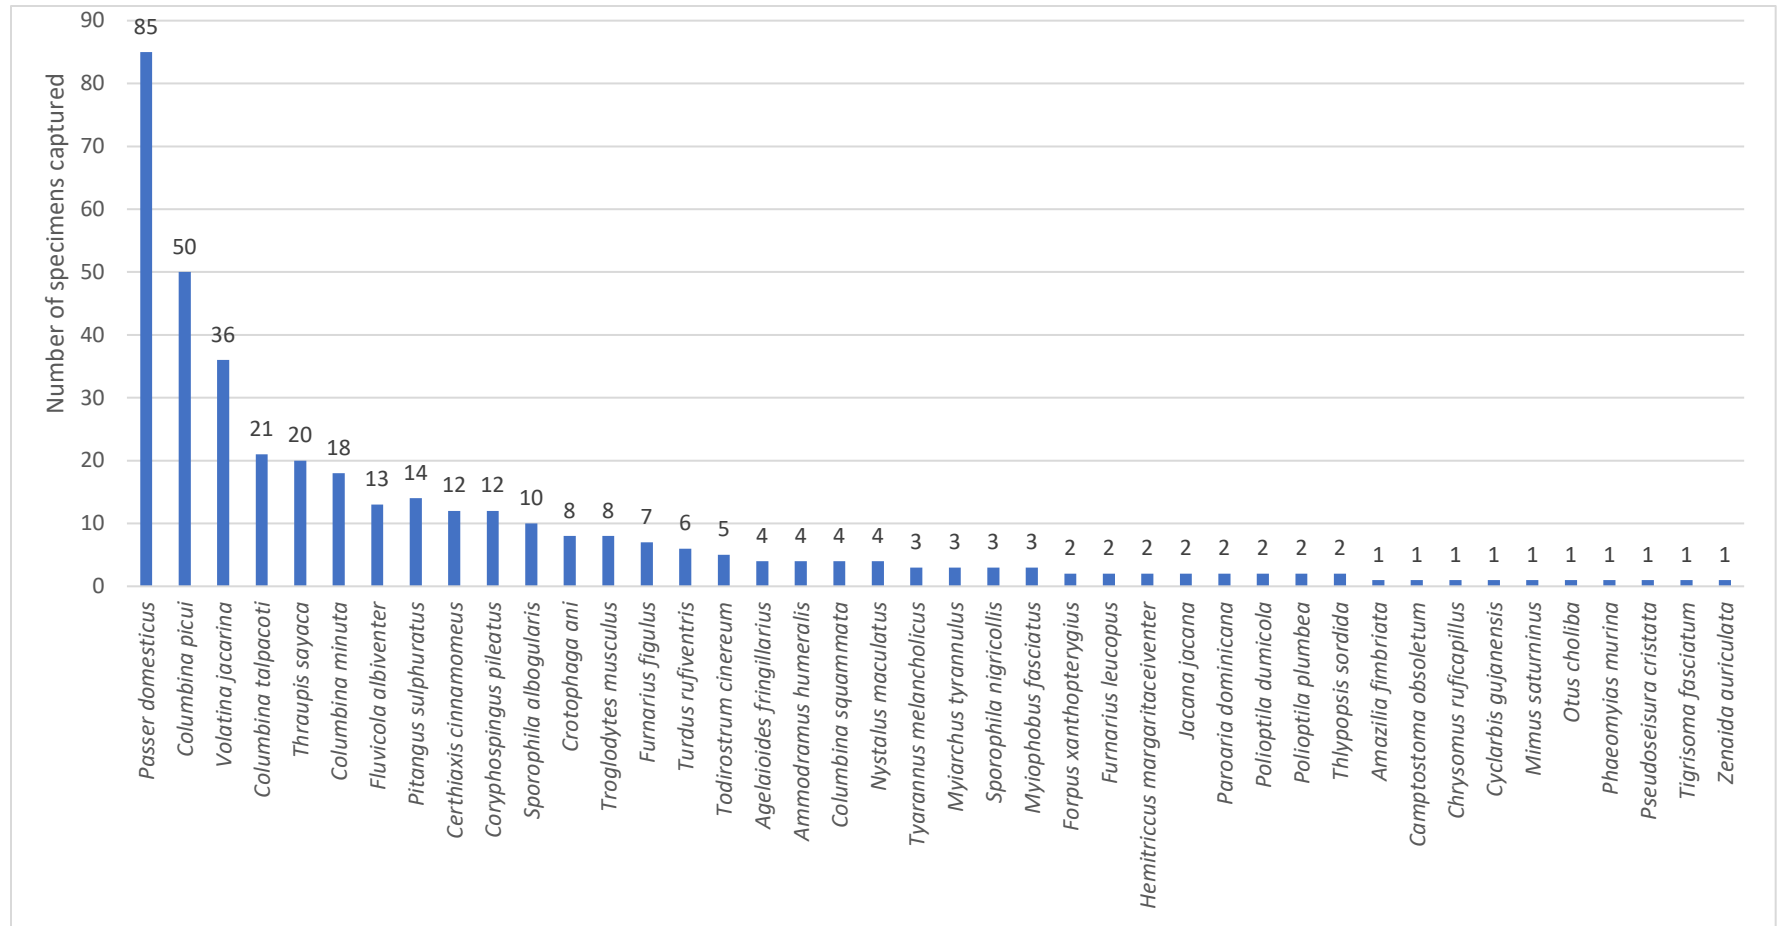

**Figure S1.** Specimens of free-ranging wild birds captured in Boa Viagem, CE in September 2019.

Supplement: s1 [file s1]
